# Supplementary material
Source: Elsevier journal article supplement (https://lshtm-eprints-repo-prod.lshtm-eprints.cdl.cosector.com/2545995/1/mmc2.pdf)
Supplement: mmc2 [file mmc2.pdf]

## A PF3D7\_0401800:GFP in Dd2

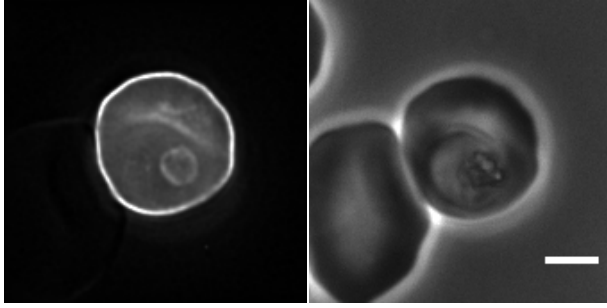

## B

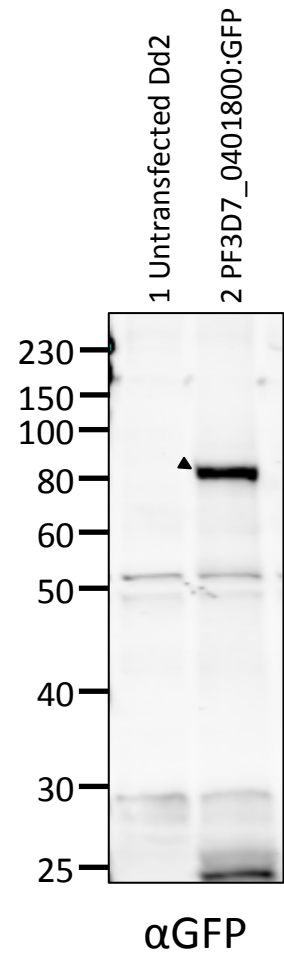

### Supplementary figure 2

(A) PF3D7\_0401800:GFP (PFD80) expressed in *P. falciparum* Dd2. The left- and right-hand images show GFP localisation and a phase contrast image, respectively. Scale bar, 2  $\mu$ m.

(B) Anti-GFP Western blot of *P. falciparum* Dd2 schizonts expressing PF3D7\_0401800:GFP (PFD80) (lane 2).  $2 \times 10^6$  schizonts were loaded per lane. Black arrow: expressed protein. Lane 1 contains untransfected *P. falciparum* Dd2 parasites.
